# Supplementary material for: Clinic, Endoscopic and Histological Features in Patients Treated with ICI Developing GI Toxicity: Some News and Reappraisal from a Mono-Institutional Experience
Source: MDPI journal article supplement (doi:10.3390/diagnostics12030685), 2022-03-11
Supplement: s1 [file s1]

**Table S1. Immune checkpoint inhibitors used in clinical practice for solid tumors.**

| ICI                       | Target         | Indications                                                                                                                                                                                                                                                                                                                                  |
|---------------------------|----------------|----------------------------------------------------------------------------------------------------------------------------------------------------------------------------------------------------------------------------------------------------------------------------------------------------------------------------------------------|
| <i>Single agents</i>      |                |                                                                                                                                                                                                                                                                                                                                              |
| Ipilimumab                | CTLA4          | Melanoma (metastatic)                                                                                                                                                                                                                                                                                                                        |
| Pembrolizumab             | PD1            | Melanoma (metastatic, adjuvant)<br>Non-small cell lung cancer (metastatic, PD-L1 >50% for first line, PD-L1 >1% for pre-treated patients)<br>Urothelial carcinoma (metastatic, pre-treated – PD-L1>10 platinum-unfit for first line)<br>Head and neck squamous cancer (metastatic)<br>MSI-H solid tumors                                     |
| Nivolumab                 | PD1            | Melanoma (metastatic, adjuvant)<br>Non-small cell lung cancer (metastatic, pre-treated)<br>Renal cell carcinoma (metastatic, pre-treated)<br>Urothelial carcinoma (metastatic, pre-treated)<br>Head and neck squamous cancer (metastatic, pre-treated)<br>Esophageal carcinoma (adjuvant, metastatic)<br>Gastric adenocarcinoma (metastatic) |
| Cemiplimab                | PD1            | Cutaneous squamous cell carcinoma                                                                                                                                                                                                                                                                                                            |
| Atezolizumab              | PD-L1          | Non-small cell lung cancer (metastatic, PD-L1 >50% for first-line, or pre-treated)<br>Urothelial carcinoma (metastatic, pre-treated – PD-L1>5% platinum-unfit for first line)                                                                                                                                                                |
| Avelumab                  | PD-L1          | Merkel cell carcinoma (metastatic)<br>Urothelial carcinoma (metastatic, pre-treated or maintenance after platinum-based 1 <sup>st</sup> line CT)                                                                                                                                                                                             |
| Durvalumab                | PD-L1          | Non-small cell lung cancer (stage III, PD-L1 >1% stable to CT+RT)                                                                                                                                                                                                                                                                            |
| <i>Combinations</i>       |                |                                                                                                                                                                                                                                                                                                                                              |
| Nivolumab +<br>Ipilimumab | PD1 +<br>CTLA4 | Metastatic melanoma<br>Non-small cell lung cancer (1 <sup>st</sup> line)<br>Renal cell carcinoma (intermediate-poor risk, 1 <sup>st</sup> line)<br>Pleural mesothelioma (metastatic)                                                                                                                                                         |

|                               |                      |                                                                                                                                              |
|-------------------------------|----------------------|----------------------------------------------------------------------------------------------------------------------------------------------|
|                               |                      | Colo-rectal cancer (MSI-H, pre-treated)                                                                                                      |
| Durvalumab + CT               | PD-L1 + CT           | Small cell lung cancer (extended stage, 1 <sup>st</sup> line)                                                                                |
| Atezolizumab +<br>bevacizumab | PD-L1 +<br>anti-VEGF | Hepatocellular carcinoma (metastatic, 1 <sup>st</sup> line)                                                                                  |
| Pembrolizumab +<br>CT         | PD1 + CT             | Head and neck squamous cancer (metastatic, 1 <sup>st</sup> line)                                                                             |
| Pembrolizumab +<br>axitinib   | PD1 + TKI            | Renal cell carcinoma (metastatic, 1 <sup>st</sup> line)                                                                                      |
| Pembrolizumab +<br>lenvatinib | PD1 + TKI            | Renal cell carcinoma (metastatic, 1 <sup>st</sup> line)<br>Endometrial carcinoma (metastatic, pre-treated)                                   |
| Avelumab +<br>axitinib        | PD-L1 (+<br>TKI)     | Renal cell carcinoma (metastatic, 1 <sup>st</sup> line)                                                                                      |
| Atezolizumab +<br>CT          | PD-L1 + CT           | Small cell lung cancer (extended stage, 1 <sup>st</sup> line)<br>Triple-negative breast cancer (metastatic, 1 <sup>st</sup> line, PD-L1 >1%) |

CT: chemotherapy; CTLA4: cytotoxic T-lymphocyte-associated antigen 4; EMA: European Medical Agency; FDA: Food and Drug Administration; MSI-H: microsatellite instability-high; PD1: programmed death 1; PD-L1: programmed death-ligand 1; RT: radiotherapy; TKI: tyrosine kinase inhibitor; VEGF: vascular endothelial growth factor.
